# Supplementary material for: Photonic force optical coherence elastography for three-dimensional mechanical microscopy
Source: PubMed Central journal article supplement (PMC5970204; doi:10.1038/s41467-018-04357-8), 2018-05-25
Supplement: 41467_2018_4357_MOESM1_ESM.pdf [file 41467_2018_4357_MOESM1_ESM.pdf]

1 **Supplementary information for "Photonic force optical**  
2 **coherence elastography for three-dimensional mechanical**  
3 **microscopy"**

4 Nichaluk Lertprapun<sup>1</sup>, Rishyashring R. Iyer<sup>1</sup>, Gavielle R. Untracht<sup>1,a</sup>, Jeffrey A. Mulligan<sup>2</sup>, and Steven G.  
5 Adie<sup>1,\*</sup>

6

7

8 <sup>1</sup> Meinig School of Biomedical Engineering, Cornell University, Ithaca, New York 14853

9 <sup>2</sup> School of Electrical and Computer Engineering, Cornell University, Ithaca, New York 14853

10 <sup>a</sup> Current affiliation: Optical and Biomedical Engineering Laboratory, School of Electrical, Electronic and  
11 Computer Engineering, The University of Western Australia, Perth, Western Australia 6009

12 \* Corresponding author: [sga42@cornell.edu](mailto:sga42@cornell.edu)

13

14 **Supplementary Figure 1**

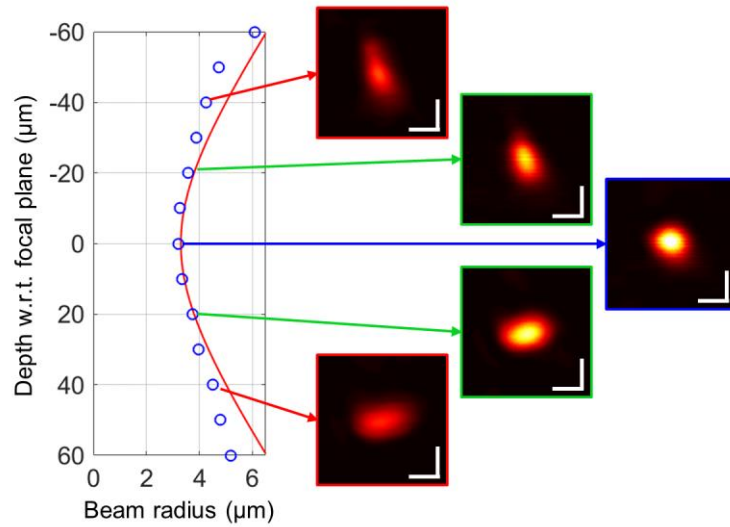

15

16 **Supplementary Figure 1 legend. Point spread function of the Photonic Force (PF) forcing beam.** Plot shows  
17 comparison between the  $1/e^2$  radii of the Point Spread Function (PSF) obtained from the reflected confocal response  
18 of a single 0.5- $\mu\text{m}$  polystyrene bead ( $\bullet$ ) and from the theoretical Gaussian beam profile with the same waist radius  
19 ( $\text{---}$ ) as function of depth. Images show the *en face* views of the PSF measured at selected depths. Scale bar: 5  $\mu\text{m}$ .

20

21 **Supplementary Figure 2**

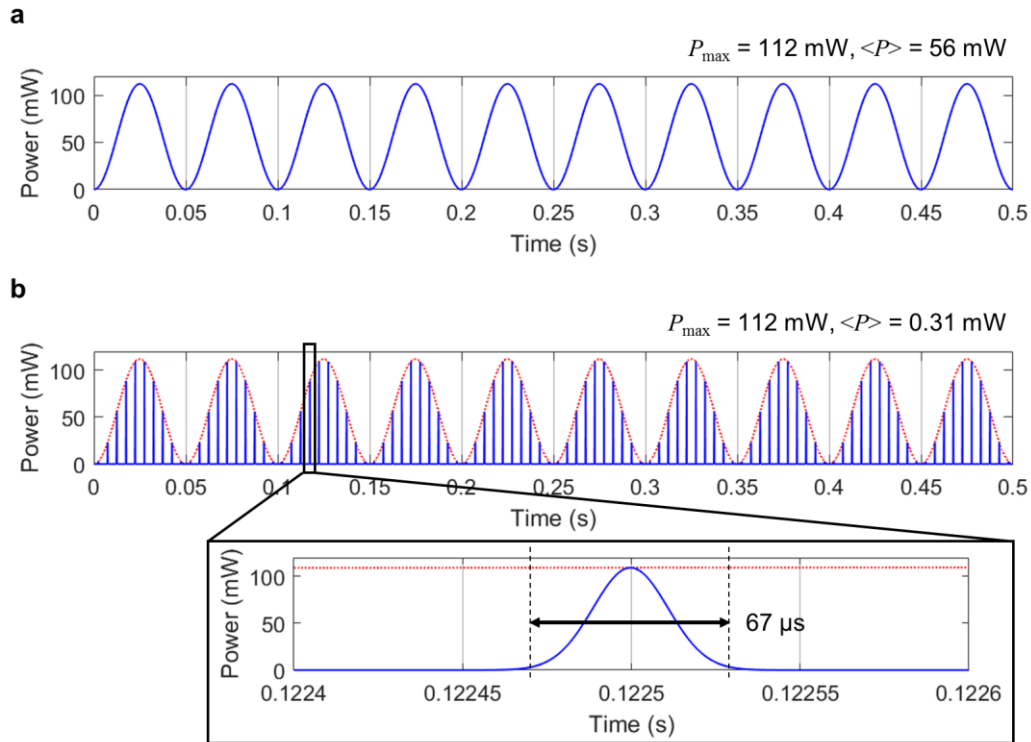

22

23 **Supplementary Figure 2 legend. Comparison of continuous harmonic modulation versus pulse-train PF drive**

24 **waveform. a**, Continuous 20-Hz sinusoidal drive waveform with peak power,  $P_{\max}$ , of 112 mW generated by the

25 function generator. **b**, Actual drive waveform felt by each of the 3- $\mu\text{m}$  beads ( $\text{---}$ ) due to beam-scanning along the fast

26 axis in the BM-mode acquisition scheme resembled a pulse-train excitation with a 20-Hz sinusoidal envelope ( $\text{---}$ ).

27 This type of excitation resulted in 3 orders of magnitude lower time-average power,  $\langle P \rangle$ , compared to the continuous

28 excitation case. The zoomed-up panel shows the pulse width of each pulse excitation based on the dwell time of the

29 PF forcing beam on each 3- $\mu\text{m}$  bead.

30

31 **Supplementary Figure 3**

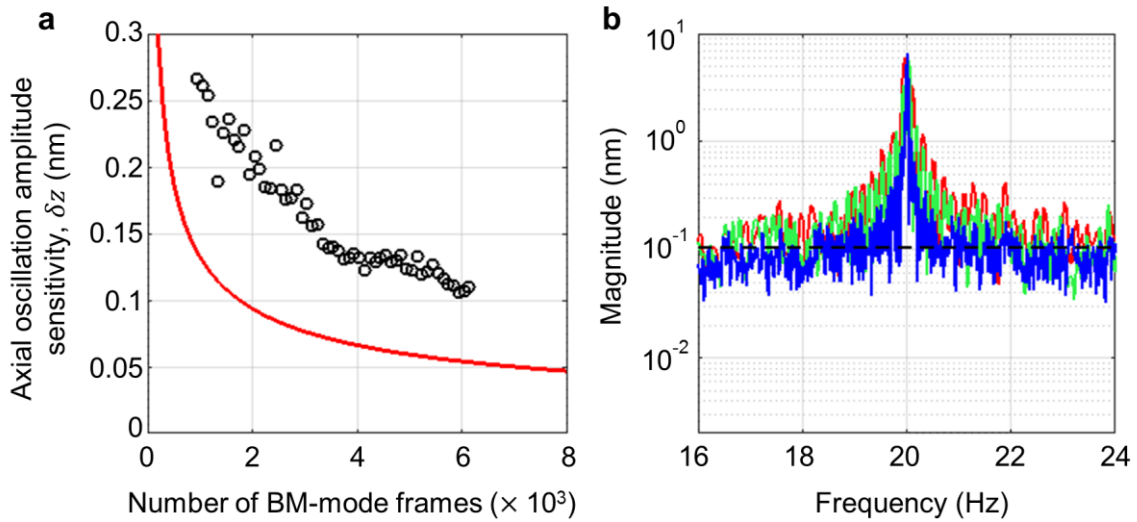

32

33 **Supplementary Figure 3 legend. Dependence of optical coherence tomography (OCT) axial oscillation**

34 **amplitude sensitivity on the number of BM-mode frames. a,** Observed (o) and shot-noise limited theoretical (—)

35 axial oscillation amplitude sensitivity for an OCT signal with SNR of 25 dB as a function of the number of BM-mode

36 frames. The observed oscillation amplitude noise floor with 6,144 BM-mode frames was 105 pm while the theoretical

37 shot-noise limit was 54 pm. **b,** Power spectrum of measured  $\Delta OPL_{tot}$ , truncated to 6,144 (—), 4,044 (—) and 2,044

38 (—) frames. Dotted line indicates the 105-pm oscillation amplitude sensitivity. We note that, in practice, the smallest

39 detectable oscillation amplitude is approximately 150 pm (3 dB above the noise floor).

40

41 **Supplementary Figure 4**

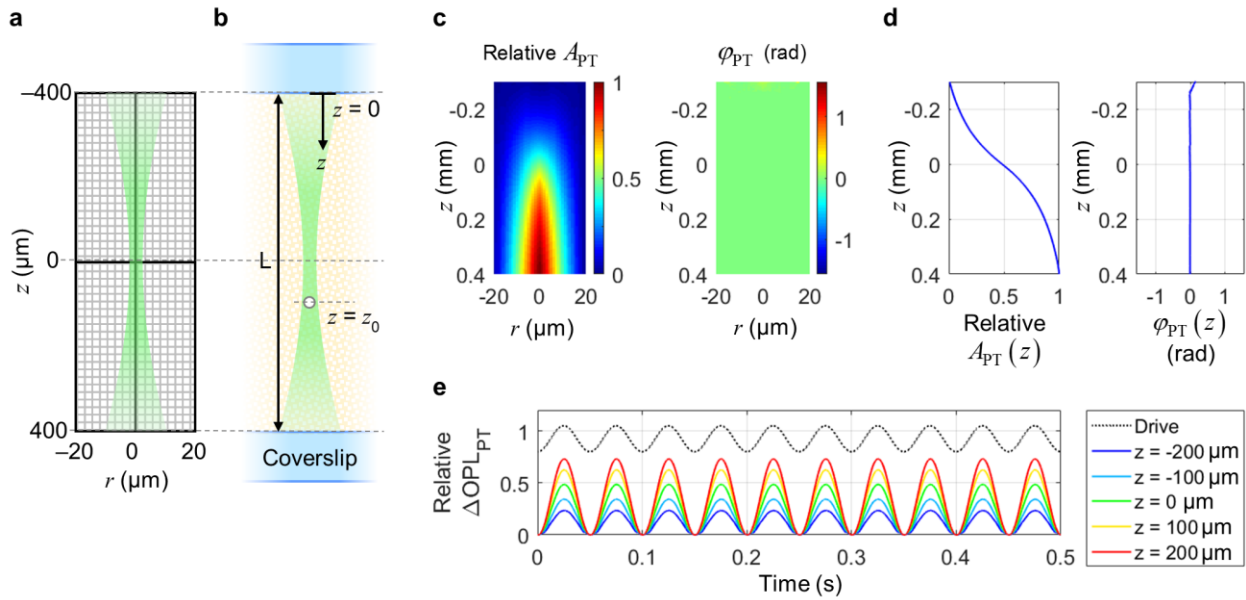

42

43 **Supplementary Figure 4 legend. Illustrations of geometries used in theoretical simulation of photothermal**

44 **response and representative simulation output. a, Space-domain in cylindrical coordinate, assuming symmetry**

45 **about  $r=0$  axis, for numerical integration of the heat transfer equation (Supplementary Equations 1-2). b, Geometry**

46 **and dimensions used for cumulative  $\Delta OPL_{PT}$  calculation by our modified version of Lapierre's model (Supplementary**

47 **Equations 3-5). c, Maps of relative  $A_{PT}$  and  $\phi_{PT}$  from the simulation using a beam with  $\lambda = 976$  nm and**

48  **$w_0 = 3.19$   $\mu\text{m}$  showed spatially varying amplitude but uniformly zero phase delay. d, Depth-dependent curves taken**

49 **at  $r=0$  for relative  $A_{PT}(z)$  and  $\phi_{PT}(z)$ . e, Time profile of the real part of relative  $\Delta OPL_{PT}$  taken from various depths**

50 **at  $r=0$ . Response at all depths appeared to be in-phase with the drive waveform.**

51

52 **Supplementary Figure 5**

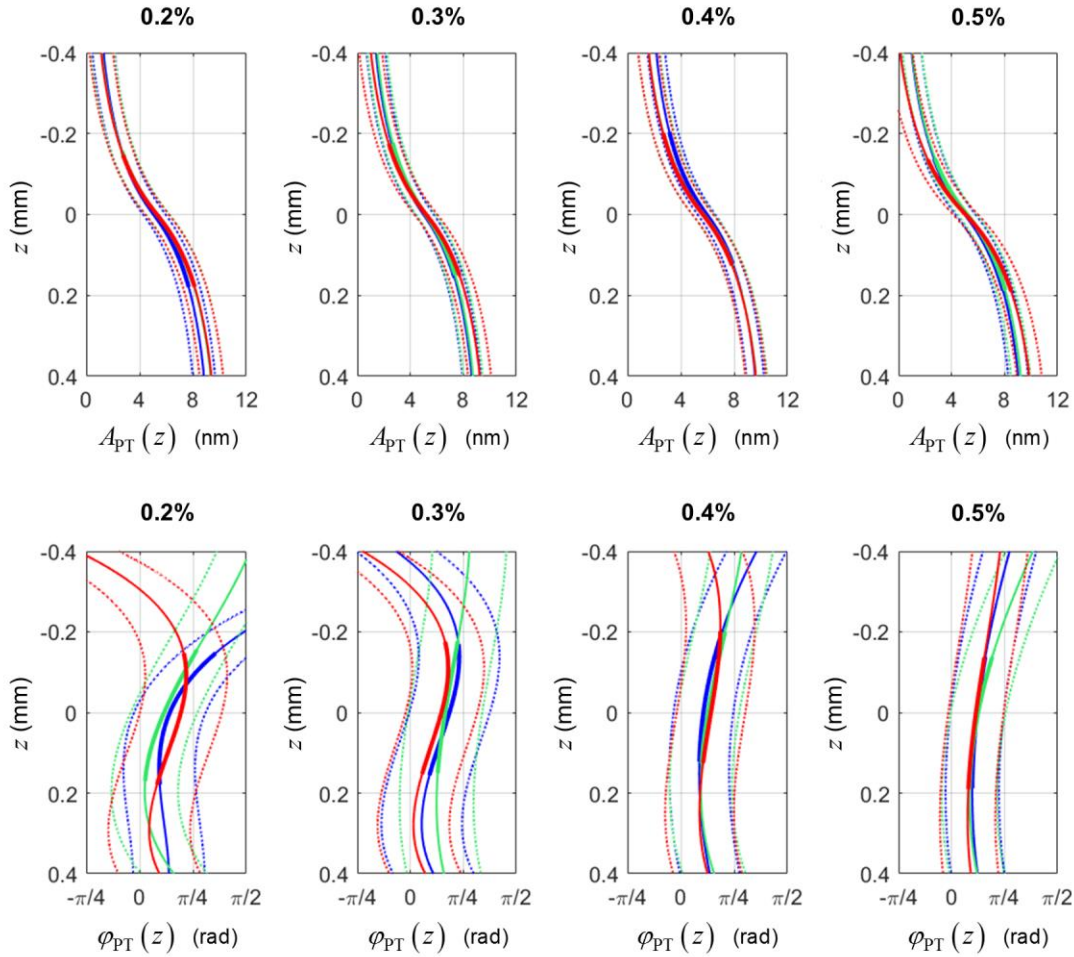

53

54 **Supplementary Figure 5 legend. Experimental curve fits for the depth-dependent photothermal response.**

55 Amplitude (top panels) and phase delay (bottom panels) of depth-dependent photothermal responses obtained from  
 56 three imaging locations (red, green, and blue lines) in each sample. Bolded lines indicate depth range around focal  
 57 plane where PF data regions are located. —: best-fitted lines. ···:  $\pm 1$  standard deviations. Although the amplitude  
 58 curves were consistent across different sample concentrations and imaging locations, the phase delay curves were  
 59 more variable with larger relative uncertainties. Particularly, the discrepancies across the three imaging locations  
 60 within the same sample appeared to be more prominent at lower agarose concentrations. This could be a result of a  
 61 larger degree of syneresis (dynamic fluid flow through the agarose polymer matrix, causing structural change due to  
 62 gel swelling-deswelling over time) at lower agarose concentrations<sup>1-3</sup> as well as larger contributions of apparent  
 63 photothermal response due to diffusive motions of the 0.1- $\mu\text{m}$  beads in hydrogels with larger pores<sup>4</sup>.

64

65 **Supplementary Figure 6**

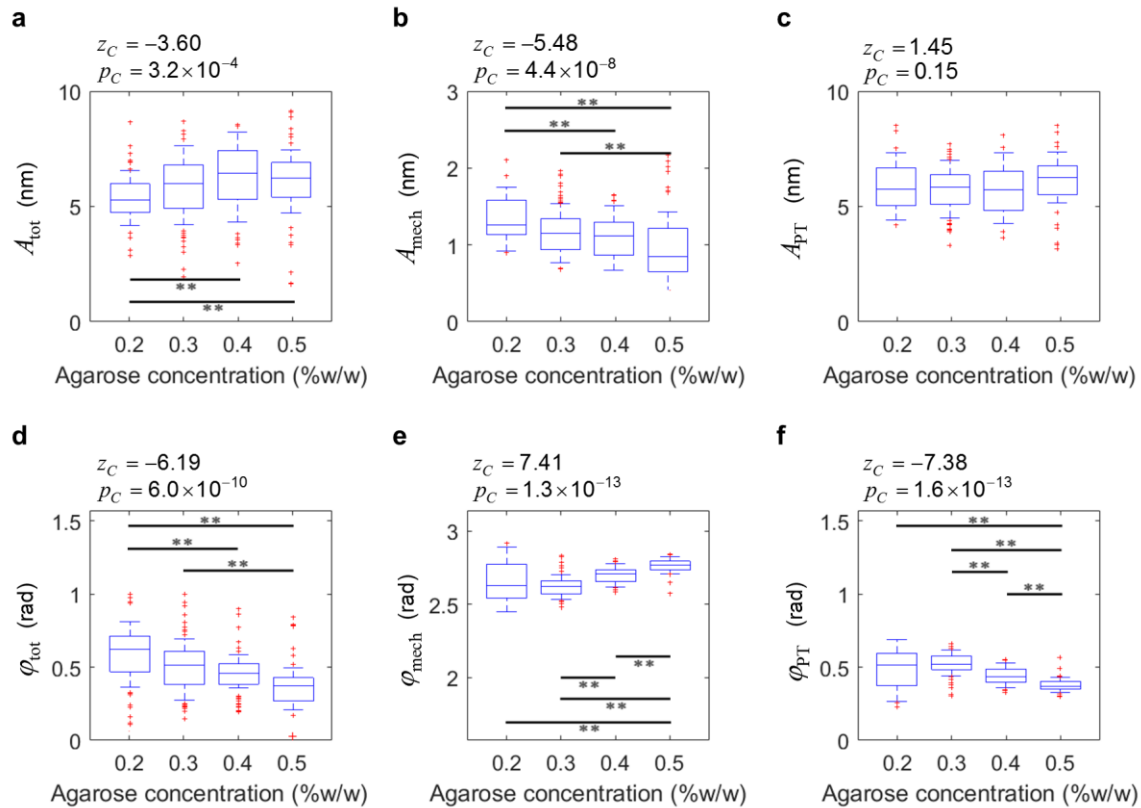

66

67 **Supplementary Figure 6 legend. Box plots comparing complex total, mechanical and photothermal**

68 **responses in agarose hydrogels.** Magnitude and phase of **a, d**, total response (omitted in Fig. 5), **b, e**, mechanical

69 response, and **c, f**, photothermal response measured by PF-OCE. Horizontal lines within boxes indicate median

70 values, boxes denote interquartile ranges. Error bars span one standard deviation; data outside of this range are

71 shown in red markers. Black bar and asterisks indicate a statistically significant difference between two agarose

72 concentrations per Kruskal-Wallis test at  $p < 0.05$  (\*) and  $p < 0.005$  (\*\*) confidence levels.  $z_C$  and  $p_C$ ,

73 respectively, denote normalized test statistic and associated p-value for Cuzick's test for trend across the four

74 agarose concentrations, ordered from 0.2% to 0.5% w/w; thus,  $z_C > 0$  indicates an increasing trend while  $z_C < 0$

75 indicates a decreasing trend. A trend was considered statistically significant if  $p_C < 0.05$ . Refer to Methods for details

76 of the statistical analysis.

77

78 **Supplementary Figure 7**

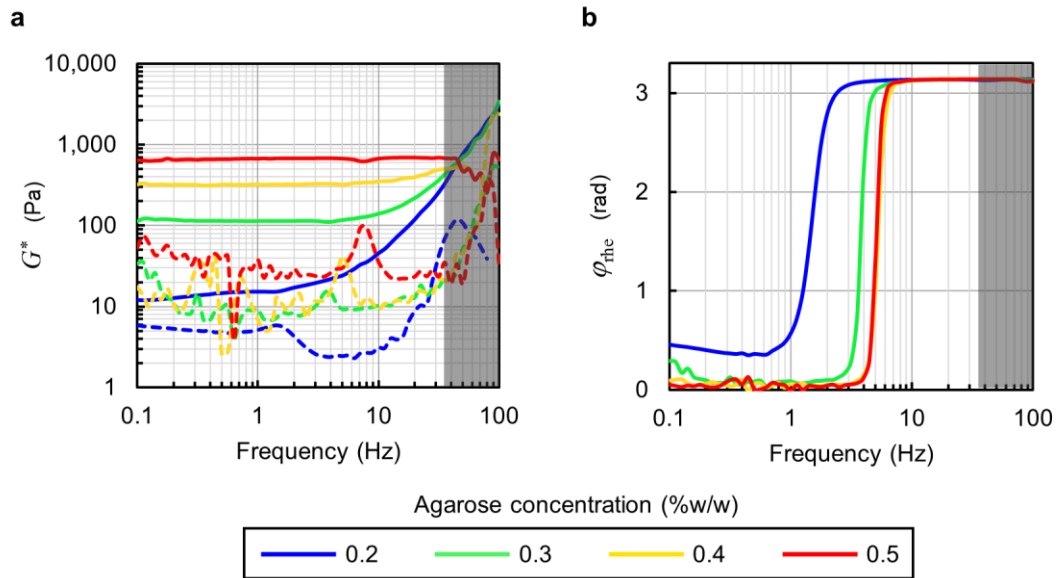

79

80 **Supplementary Figure 7. Complex shear modulus,  $G^*$ , and phase delay,  $\varphi_{rhe}$ , measured by oscillatory test on**

81 **a parallel-plate shear rheometer. a, Storage moduli (—) and loss moduli (---) as a function of oscillation frequency.**

82 **b, Raw phase delays between displacement and applied torque. The frequencies at which the sharp rise in phase**

83 **delays occur roughly correspond to the damped natural frequencies of the samples. Shaded regions correspond to**

84 **the frequency range over which measurements were unreliable.**

85



86 **Supplementary Figure 8**

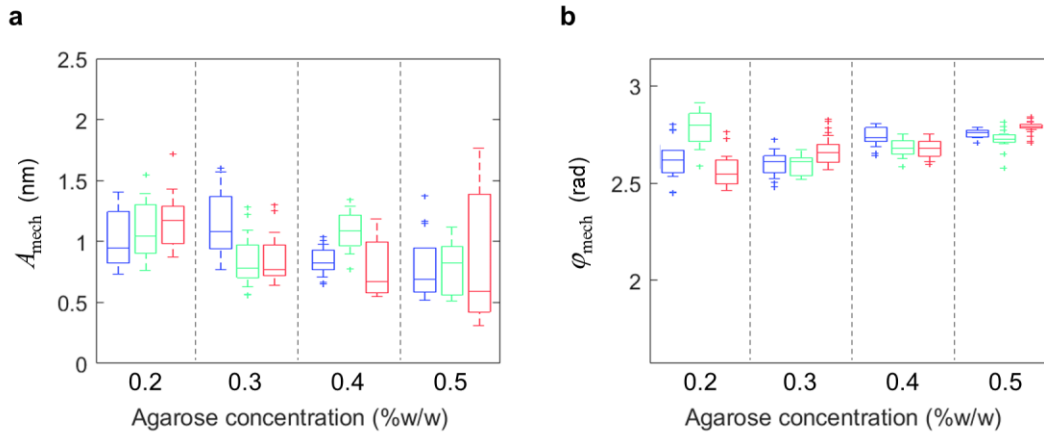

87

88 **Supplementary Figure 8 legend. Comparison of bead mechanical responses from three imaging locations in**  
89 **each hydrogel sample.** Box plots of **a**, amplitude and **b**, phase of bead mechanical responses measured from three  
90 imaging locations (indicated by **blue**, **green**, and **red** colors) in each sample. Horizontal lines within boxes indicate  
91 median values, boxes denote interquartile ranges. Error bars span one standard deviation; data outside of this range  
92 are shown in red markers

93

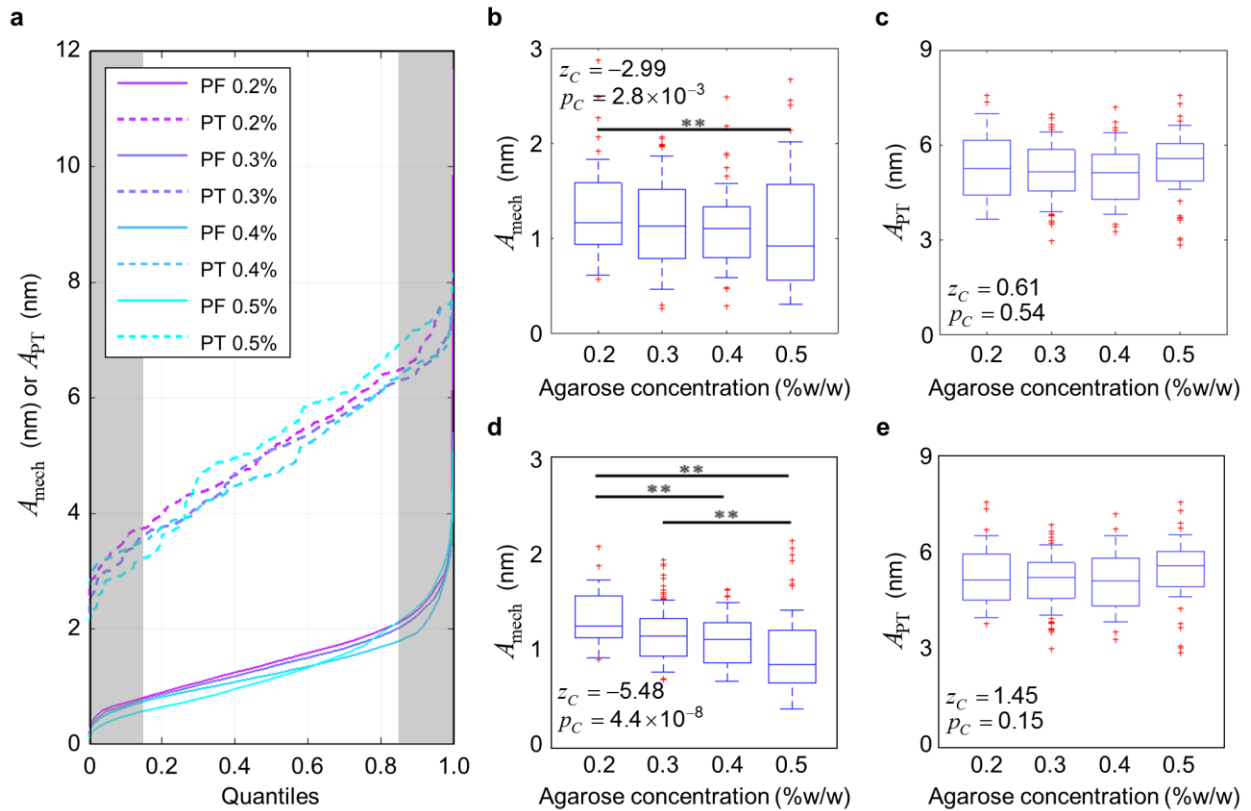

95

96 **Supplementary Figure 9 legend. Exclusion of outliers for multiple comparisons by Kruskal-Wallis test among**97 **four agarose concentrations. a**, Quantiles of magnitude of mechanical and photothermal responses measured from98 each agarose concentration. The dramatic rise in  $A_{\text{mech}}(x_b, y_b, z_b)$  around the lower and the higher quantiles (shaded

99 regions) may reflect sources of variability described in Supplementary Discussions, and are considered as outliers for

100 each concentration. However, from 0.15 to 0.85 quantiles, the  $A_{\text{mech}}(x_b, y_b, z_b)$  curves maintain a monotonically101 increasing linear regime. In contrast,  $A_{\text{PT}}(z_b)$  curves do not maintain any particular trend versus concentration

102 throughout the entire distribution. The effect of excluding data in the shaded regions (outliers) is visualized by

103 comparing magnitude of mechanical and photothermal responses **b, c**, before against **d, e**, after the exclusion of104 data. The general decreasing trend versus concentration is observed for  $A_{\text{mech}}(x_b, y_b, z_b)$  in both cases, but the

105 contrast between concentrations is more apparent after excluding the outliers from the analysis. No significant trend

106 or difference between concentrations could be observed for  $A_{\text{PT}}(z_b)$  in either case. In **b-e**, horizontal lines within

107 boxes indicate median values, boxes denote interquartile ranges. Error bars span one standard deviation; data

108 outside of this range are shown in red markers. Black bar and asterisks indicate a statistically significant difference  
109 between two agarose concentrations per Kruskal-Wallis test at  $p < 0.05$  (\*) and  $p < 0.005$  (\*\*) confidence levels.  $z_C$   
110 and  $p_C$ , respectively, denote normalized test statistic and associated p-value for Cuzick's test for trend across the  
111 four agarose concentrations, ordered from 0.2% to 0.5% w/w; thus,  $z_C > 0$  indicates an increasing trend while  $z_C < 0$   
112 indicates a decreasing trend. A trend was considered statistically significant if  $p_C < 0.05$ . Refer to Methods for details  
113 of the statistical analysis.

114

115 **Supplementary Figure 10**

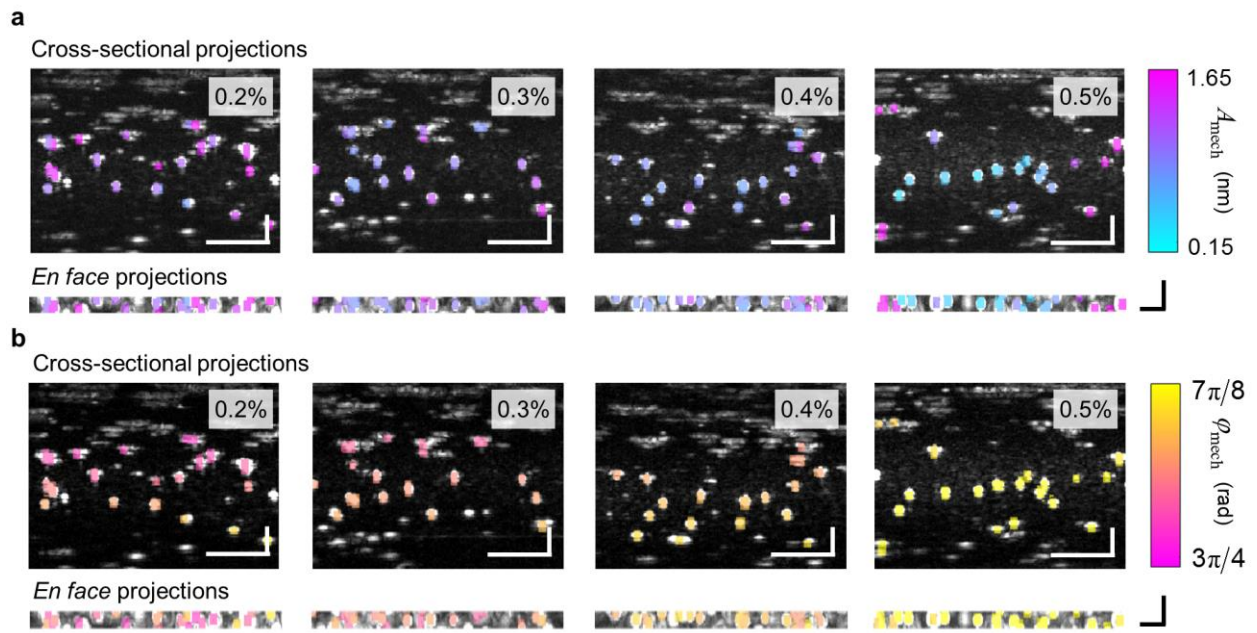

116

117 **Supplementary Figure 10 legend. Cross-sectional and *en face* projections of complex mechanical response**

118 **overlaid on the OCT images for agar concentrations. a,  $A_{\text{mech}}(x_b, y_b, z_b)$  for 0.2-0.5% agar gel w/w b,**

119  **$\varphi_{\text{mech}}(x_b, y_b, z_b)$  for 0.2-0.5% agar gel w/w. Scale bars: 50  $\mu\text{m}$  (white, cross-sectional projections) and 20  $\mu\text{m}$  (black,**

120 ***en face* projections).**

121

**Supplementary Table 1.** Properties of agarose hydrogels.

| <b>Physical properties</b>                                                                 |                           |
|--------------------------------------------------------------------------------------------|---------------------------|
| Mass density, $\rho$ (kg m <sup>-3</sup> ) <sup>5 **</sup>                                 | 1000                      |
| Thermal conductivity, $k$ (W m <sup>-1</sup> K <sup>-1</sup> ) <sup>6 *</sup>              | 0.570 (0.2%) <sup>z</sup> |
|                                                                                            | 0.554 (0.3%)              |
|                                                                                            | 0.538 (0.4%)              |
|                                                                                            | 0.523 (0.5%)              |
| Specific heat capacity, $c_V$ (J kg <sup>-1</sup> K <sup>-1</sup> ) <sup>5 **</sup>        | 4187                      |
| <b>Photothermal properties</b>                                                             |                           |
| Absorption coefficient, $\alpha$ (m <sup>-1</sup> ) <sup>7 **</sup>                        | 50 (976 nm)               |
| Thermo-optic coefficient, $dn/dT$ (K <sup>-1</sup> ) <sup>8 **</sup>                       | -9.17 × 10 <sup>-5</sup>  |
| Thermal expansion coefficient, $\beta$ (m m <sup>-1</sup> K <sup>-1</sup> ) <sup>9 *</sup> | 3.68 × 10 <sup>-6</sup>   |

122

123 \* Values were obtained from extrapolation of the reported results at higher agarose concentrations.

124 \*\* Properties not found for agarose hydrogels, values taken for water instead.

125

126

**Supplementary Table 2.** Thresholds for OCT image segmentation.

| Notation                                                                             | Description                                       | Value used * |
|--------------------------------------------------------------------------------------|---------------------------------------------------|--------------|
| <b>Thresholds for 0.1-<math>\mu\text{m}</math> beads in photothermal data region</b> |                                                   |              |
| $lb_{\text{PT}}$                                                                     | Lower bound of reconstructed OCT signal magnitude | 700 (a.u.)   |
| $ub_{\text{PT}}$                                                                     | Upper bound of reconstructed OCT signal magnitude | 1400 (a.u.)  |
| $lb_{\text{PT, dB}}$                                                                 | Lower bound of OCT SNR                            | 3 (dB)       |
| $ub_{\text{PT, dB}}$                                                                 | Upper bound of OCT SNR                            | 12 (dB)      |
| <b>Thresholds for 3-<math>\mu\text{m}</math> beads in total response data region</b> |                                                   |              |
| $lb_{\text{tot}}$                                                                    | Lower bound of reconstructed OCT signal magnitude | 5,000 (a.u.) |
| $lb_{\text{tot, dB}}$                                                                | Lower bound of OCT SNR                            | 25 (dB)      |

127

128 \* Values are specific to the results presented in this manuscript. Values may change according to different  
 129 acquisition settings or experimental conditions.

130

## 131 **Supplementary Methods**

### 132 **Theoretical simulation of photothermal response.**

133 The parameters and the geometry used in the simulation can be found in Supplementary Table 1  
134 and Supplementary Fig. 4, respectively. First, the (three dimensional) 3D heat transfer equation was  
135 numerically solved to obtain the change in temperature due to optical absorption by water molecules in  
136 the agarose hydrogels. We assumed cylindrical symmetry about the optical axis of the PF forcing beam  
137 and assumed zero heat flux normal to each of the four domain boundaries. We also assumed that the PF  
138 forcing beam was Gaussian, described by the waist radius obtained from the PSF measurement shown in  
139 Supplementary Fig. 1. The differential equation is given by

$$140 \quad \rho c_V \frac{\partial T}{\partial t} = k \left( \frac{1}{r} \frac{\partial}{\partial r} \left( r \frac{\partial T}{\partial r} \right) + \frac{\partial^2 T}{\partial z^2} \right) + P(r, z, t), \quad (1)$$

141 and

$$142 \quad P(r, z, t) = \frac{\alpha P_0}{\pi w^2(z)} e^{-\left( \frac{r^2}{w^2(z)} + \alpha z \right)} e^{i(\omega t + \varphi_{\text{drive}})}, \quad (2)$$

143 where  $r = [-20, 20] \mu\text{m}$  and  $z = [-400, 400] \mu\text{m}$  denote the radial and axial coordinates, respectively,  $T$   
144 denotes temperature,  $w$  denotes beam radius,  $P_0$  denotes beam power and  $\omega$  denotes the angular  
145 modulation frequency. As such,  $P(r, z, t)$  denotes the absorbed optical power per unit volume.

146 After solving for the temperature change,  $\Delta T$ , the optical path length (OPL) change due to photothermal  
147 response,  $\Delta\text{OPL}_{\text{PT}}$ , was calculated at each time step by

$$148 \quad \Delta\text{OPL}_{\text{PT}} = \Delta\text{OPL}_{\text{above}} - \Delta\text{OPL}_{\text{below}} \quad (3)$$

149 where

$$150 \quad \Delta\text{OPL}_{\text{above}} = \int_0^{z_0} \left( n_0 + \frac{dn}{dT} \Delta T(r, z) \right) (1 + \beta \Delta T(r, z)) dz - \int_0^{z_0} n_0 dz, \quad (4)$$

151 and

$$\Delta\text{OPL}_{\text{below}} = \left[ \int_{z_0}^L (1 + \beta\Delta T(r, z)) dz - \int_{z_0}^L dz \right] \left( n_0 + \frac{dn}{dT} \Delta T(r, z_0) \right). \quad (5)$$

153 The expressions  $\Delta\text{OPL}_{\text{above}}$  and  $\Delta\text{OPL}_{\text{below}}$  describe the OPL change measured on the bead due  
 154 to the photothermal response of the portion of the medium located above the bead ( $z \leq z_0$ ) and below the  
 155 bead ( $z_0 < z \leq L$ ), respectively. This geometry is illustrated in Supplementary Fig. 4. We note that the  
 156 model by Lapierre *et al.*<sup>10</sup> did not take into account  $\Delta\text{OPL}_{\text{below}}$  and  $\Delta\text{OPL}_{\text{PT}}$  was simply given by  
 157 Supplementary equation (4). The measurements by Lapierre *et al.*<sup>10</sup> were acquired in a phantom with  
 158 absorbing particles embedded in a less absorbing medium inside a large unconfined container, which  
 159 allowed the medium surrounding the particles to expand freely due to the heating of the absorbing  
 160 particles, and the OPL change depended only on the photothermal response of the medium above the  
 161 bead. In other words,  $\Delta\text{OPL}_{\text{PT}} = \Delta\text{OPL}_{\text{above}}$  when the thermal expansion of the medium located below the  
 162 bead had negligible effect on the physical displacement of the bead relative to the top of the sample (  
 163  $z = 0$ ). Here, we included the contribution of both the thermal expansion of the medium above the bead,  
 164 which pushed the bead away from  $z = 0$ , in Supplementary equation (4) and the thermal expansion of the  
 165 medium beneath the bead, which pushed the bead closer to  $z = 0$ , in Supplementary equation (5) to  
 166 account for our thin confined sample configuration. In Supplementary equation (5), the terms inside the  
 167 square brackets describe the physical displacement of the bead due to the thermal expansion of the  
 168 medium below the bead. To obtain the OPL change, this physical displacement is multiplied by the  
 169 refractive index of the medium where the bead is located, given by the remaining terms in Supplementary  
 170 equation (5).

171 The initial refractive index of the medium,  $n_0$ , was assumed to be 1.4. We also used  $P_0 = 1 \text{ W}$  in  
 172 the simulation to generate large enough OPL change to ensure that the numerical solutions remained  
 173 above the machine precision limit ( $\approx 10^{-12}$ ). As a result, the magnitude of the simulated  $\Delta\text{OPL}_{\text{PT}}$  could  
 174 not be used for direct comparison against the experimentally measured  $A_{\text{PT}}$ . Alternatively, we normalized



175 the magnitude of  $\Delta\text{OPL}_{\text{PT}}$  by  $|\Delta\text{OPL}_{\text{PT}}(r, z)|/|\Delta\text{OPL}_{\text{PT}}(0, L)|$  and obtained relative  $A_{\text{PT}}$ . See

176 Supplementary Fig. 4 for example of simulation output.

177 **Order-of-magnitude estimation of relative force and displacement of 3- $\mu\text{m}$  and 0.1- $\mu\text{m}$  beads.**

178 In order to measure both the total response,  $\Delta\text{OPL}_{\text{tot}}$ , and the photothermal response,  $\Delta\text{OPL}_{\text{PT}}$ ,  
179 we used two bead sizes: higher scattering 3- $\mu\text{m}$  beads provided access to  $\Delta\text{OPL}_{\text{tot}}$  and low-scattering  
180 0.1- $\mu\text{m}$  beads allowed us to isolate  $\Delta\text{OPL}_{\text{tot}}$ . The 3- $\mu\text{m}$  beads were added to achieve a mean particle  
181 separation of 15  $\mu\text{m}$  in 3D. The 0.1- $\mu\text{m}$  beads were added at a much higher density, achieving a mean  
182 particle separation of only 2  $\mu\text{m}$ . In order to justify our assumption that the OPL oscillation measured on  
183 the 0.1- $\mu\text{m}$  beads reflected the photothermal response alone, with negligible contribution of the  
184 mechanical response, we considered the theoretical prediction of two extreme cases.

185 Theoretical prediction (weak mechanical coupling limit). We considered two single-bead  
186 scenarios (either 0.1- $\mu\text{m}$  or 3- $\mu\text{m}$  beads), neglecting the presence of multiple beads within the excitation  
187 volume. Essentially this assumes that the displacements of a bead are completely independent to those  
188 of nearby beads. In this case, the relative magnitude of radiation-pressure force between the 3- $\mu\text{m}$  and  
189 the 0.1- $\mu\text{m}$  beads can directly be obtained from separate GLMT simulations for each bead size. We  
190 obtained the ratio of radiation-pressure force magnitude per unit power for the two bead sizes of  
191  $\bar{F}_{\text{rad},3\mu\text{m}}/\bar{F}_{\text{rad},0.1\mu\text{m}} \approx 10^5$ . Likewise, the resulting bead oscillation amplitude could be obtained from  
192 Oestreicher's model<sup>11</sup>, independently for each bead size. We obtained the resulting ratio of bead  
193 oscillation amplitude per unit power of  $\bar{u}_{0,3\mu\text{m}}/\bar{u}_{0,0.1\mu\text{m}} \approx 10^4$ .

194 Theoretical predication (strong mechanical coupling limit). We considered an equivalent rigid  
195 body scenario and accounted for the presence of multiple 0.1- $\mu\text{m}$  beads (or a separate scenario with a  
196 single 3- $\mu\text{m}$  bead) within the excitation volume. We approximated the PF excitation volume as a rigid  
197 sphere with radius of 3.19  $\mu\text{m}$ , the  $1/e^2$  radius of our PF forcing beam. In the strong mechanical coupling  
198 limit (all beads within the excitation volume are connected by rigid rods), the net external force acting on  
199 the rigid PF excitation volume was the sum of all forces on all beads inside the excitation volume. Given  
200 our mean particle separation, the ratio of the number of beads inside the excitation volume was  
201  $N_{3\mu\text{m}}/N_{0.1\mu\text{m}} \approx 10^{-2}$ . In this case, we obtained the net radiation-pressure force ratio on the PF excitation  
202 volume for the two scenarios of  $\bar{F}_{\text{rad},3\mu\text{m}}/\bar{F}_{\text{rad},0.1\mu\text{m}} \approx 10^5 \cdot 10^{-2} = 10^3$ . Since the excitation volume was a

203 rigid sphere of the same size for both cases, we also obtained the resulting bead oscillation amplitude  
204 ratio of  $\bar{u}_{0,3\mu\text{m}}/\bar{u}_{0,0.1\mu\text{m}} \approx 10^3$ .

205 Experimental prediction based on OCT scattering. We expected that the actual relative difference  
206 in the oscillation amplitude of the 3- $\mu\text{m}$  and 0.1- $\mu\text{m}$  beads in our experiments would lie somewhere  
207 between these two extreme theoretical cases for weak or strong mechanical coupling. As an experimental  
208 comparison to our theoretical estimation, we used the observed OCT scattering intensity to infer the  
209 relative magnitude of radiation pressure on the two bead sizes. We note that this assumes that the  
210 relative backscattering from the 0.1- $\mu\text{m}$  versus 3- $\mu\text{m}$  beads at 976 nm is comparable to the relative  
211 backscattering collected by the OCT system from the 0.1- $\mu\text{m}$  versus 3- $\mu\text{m}$  beads at 1,300 nm. The ratio  
212 of observed maximum OCT scattering intensity for the two bead sizes was  $|\tilde{S}_{3\mu\text{m}}|^2/|\tilde{S}_{0.1\mu\text{m}}|^2 \approx 10^3$ , where  
213  $\tilde{S}$  denotes the complex OCT signal. The OCT scattering intensity in each pixel of the OCT image  
214 included the contribution from all beads inside the point spread function (PSF) of the OCT beam. At the  
215 focal plane, the OCT beam had comparable waist radius to the PF forcing beam. Given our mean particle  
216 separation, the ratio of the number of beads inside the PSF of the OCT beam was  $N_{3\mu\text{m}}/N_{0.1\mu\text{m}} \approx 10^{-2}$ .  
217 Assuming all beads inside the PSF contributed equally to the observed OCT scattering intensity, we  
218 arrived at the radiation-pressure force per one 3- $\mu\text{m}$  bead to radiation-pressure force per one 0.1- $\mu\text{m}$   
219 bead ratio of  $\bar{F}_{\text{rad},3\mu\text{m}}/\bar{F}_{\text{rad},0.1\mu\text{m}} \approx 10^3/10^{-2} = 10^5$ , which agrees with our theoretical prediction in the weak  
220 mechanical coupling limit.

221

222 **Characterization of the PF forcing beam.**

223           The point spread function (PSF) of the PF forcing beam was characterized on a single 0.5- $\mu\text{m}$   
224 polystyrene bead on a monolayer phantom in air. A photoreceiver (Newport, 2051-FS) was used to collect  
225 the reflected confocal response from a bead as the monolayer phantom was translated to various depths.  
226 The monolayer phantom was made by first, diluting a stock solution of 0.5- $\mu\text{m}$  polystyrene bead  
227 suspension (Sigma-Aldrich, LB5, 10% solids) in ethanol (VWR, Ethanol, Pure) to a 1:10<sup>9</sup> volume ratio. A  
228 1- $\mu\text{L}$  drop of the diluted microsphere solution was spread on top of an anti-reflection-coated plano-convex  
229 lens (Thorlabs, LA1213-B), then left to sit until all solvent had evaporated. The AR-coated plano-convex  
230 lens was necessary to sufficiently reduce background reflection detected by the photoreceiver. The PSF  
231 of the PF forcing beam used in the experiments in this paper is shown in Supplementary Fig. 1.

232

233 **Beam alignment procedure.**

234 To maximize the force exerted by the PF forcing beam during the acquisition, the PF forcing  
235 beam was aligned to the OCT imaging beam such that the two beams focused to the same position in 3D  
236 space. This alignment was checked before every experiment. The position of the PF forcing beam was  
237 adjusted by the beam control module (BCM) consisting of six components: two collimating lenses, two  
238 spherical-aberration-compensation lenses and two right-angle mirrors. A photoreceiver (Newport,  
239 2051-FS) was used to detect the reflected confocal response of the PF forcing beam. First, the alignment  
240 in the axial direction (along the optical axis of the two beams) was done by imaging a flat glass slide. The  
241 OCT focal plane was located by translating the glass slide in the axial direction and identifying the depth  
242 at which the detected OCT signal from the glass surface was maximized. The PF forcing beam focal  
243 plane was similarly located by identifying the depth at which the intensity detected by the photoreceiver  
244 was maximized. The position of the collimating lenses in the BCM were adjusted until the focal planes of  
245 the two beams were coplanar. Next, the alignment in the transverse plane was determined by imaging a  
246 USAF target. The confocal image from the PF forcing beam was compared to the *en face* view of the 3D  
247 OCT image. The right-angle mirrors in the BCM were tipped and tilted to steer the PF forcing beam in the  
248 transverse plane until both images of the USAF target were aligned.

249

250 **Calculation of OCT SNR and shot noise-limited oscillation amplitude sensitivity.**

251 The oscillation amplitude sensitivity, fundamentally limited by the OCT phase noise floor,  
 252 specifies the best achievable precision of the OPL oscillation measurements. In the shot noise limit, the  
 253 smallest detectable phase difference between two adjacent BM-mode frames (that is, phase difference at  
 254 a particular spatial pixel at two time points),  $\delta\Delta\phi$ , depends on the SNR of the OCT signal and is given by  
 255 Park *et al.*<sup>12</sup>

$$256 \quad \delta\Delta\phi = \frac{1}{\sqrt{\text{SNR}}}. \quad (6)$$

257 Then, the physical (not OPL) oscillation amplitude sensitivity,  $\delta z$ , obtained from the reconstructed OPL  
 258 oscillation (a series of phase difference measurements) is given, based on Chang *et al.*<sup>13</sup>, by

$$259 \quad \delta z = \frac{1}{\sqrt{\text{SNR} \cdot N_A \cdot N_B}} \frac{\lambda}{4\pi n_{\text{med}}}, \quad (7)$$

260 where  $n_{\text{med}}$  denotes refractive index of the medium while  $N_A$  and  $N_B$  denote the number of samples per  
 261 modulation cycle and the total number of modulation cycles measured, respectively. We note that the  
 262 expression from Chang *et al.*<sup>13</sup> differs from Supplementary equation (7) by a factor of  $1/\sqrt{2}$  because the  
 263 authors considered the smallest detectable phase,  $\delta\phi = 1/\sqrt{2 \cdot \text{SNR}}$ , whereas we considered the smallest  
 264 detectable phase difference between two adjacent BM-mode frames,  $\delta\Delta\phi$ <sup>12</sup>, since this was what we used  
 265 in our calculation of  $\Delta\text{OPL}$ . For the 6,144-frame BM-mode acquisition scheme implemented in our  
 266 experiments,  $N_A$  was kept at 10 frames per modulation cycle (200-Hz frame rate at 20-Hz modulation  
 267 frequency) and  $N_B$  was 614 full modulation cycles per BM-mode dataset. The SNR was experimentally  
 268 approximated by

$$269 \quad \text{SNR}(x, y, z_i) = \left( \frac{\sum_{i-2}^{i+2} |\tilde{S}_{\text{signal}}(x, y, z_i)|}{\sum_{i-2}^{i+2} |\tilde{S}_{\text{noise}}(z_i)|} \right)^2, \quad (8)$$

270 where  $z_i$  denotes the pixel depth corresponding to the maximum OCT intensity on a particle,

271  $\tilde{S}_{\text{signal}}(x, y, z)$  denotes the complex OCT signal after reconstruction, and  $\tilde{S}_{\text{noise}}(z)$  denotes the complex

272 depth-dependent noise floor of the OCT signal.  $\tilde{S}_{\text{noise}}(z)$  was obtained from the difference of two  
273 reconstructed space-domain OCT background images, averaged across the transverse plane to obtain a  
274 depth-dependent complex OCT noise. The theoretical and observed oscillation amplitude sensitivity as a  
275 function of the number of BM-mode frames are shown in Supplementary Fig. 2. The observed  
276 displacement sensitivity as a function of the number of BM-mode frames was obtained from the Fourier  
277 transform of the time-domain  $\Delta\text{OPL}_{\text{tot}}$ , truncated to a decreasing number of frames from the original  
278 6,144-frame data. The oscillation amplitude noise floor was calculated from the root-mean-square of the  
279 noise spectrum adjacent to the 20-Hz response peak.  
280

281 **Parallel-plate shear rheometer measurements.**

282 A parallel-plate shear rheometer (TA Instruments DHR-3) with 40 mm diameter Peltier plate was  
283 used to measure the bulk complex shear modulus and phase delay of the agarose hydrogels. 3 samples  
284 were tested for each agarose concentration; each sample was tested 3 times consecutively. With these  
285 measurement conditions, we note that the rheometer testing does not replicate the boundary conditions  
286 presented in the PF-OCE measurements. Each test consisted of an oscillatory sweep from 0.1-100 Hz  
287 with torque amplitude of 10  $\mu\text{N}\cdot\text{m}$ . The complex shear modulus and phase delay from a representative  
288 test for each agarose concentration can be found in Supplementary Fig. 5. Although the shear rheometer  
289 could operate up to 100-Hz oscillation frequency, results at higher frequencies (typically greater than  
290 20 Hz) are more prone to errors due to sample slippage and inaccurate phase angle measurements  
291 above the damped natural frequency (indicated by the sharp rise in phase delay). Any data points that  
292 reported negative values for either the real or the imaginary part of the complex shear modulus were  
293 excluded because they indicated inaccurate measurements.

294



## 295 **Supplementary Discussion**

### 296 **Reliability and accuracy of the theoretical simulation of the photothermal response.**

297 In principle, the contributions of both amplitude and phase of  $\Delta\text{OPL}_{\text{PT}}$  in a homogeneous sample  
298 may be obtained from the theoretical simulation based on the model of photothermal phenomena in  
299 Photothermal OCT (PT-OCT). However, we were not able to ascertain the accuracy of our theoretical  
300 photothermal response simulation under our experimental conditions due to several reasons. Firstly,  
301 many of the material properties required for the simulation were not available in the literature for our  
302 specific agarose hydrogels. We made approximations by taking properties of water or extrapolated from  
303 the available results in the literature to complete our simulation (Supplementary Table 1). Secondly, our  
304 current numerical simulation in MATLAB was limited by machine precision, in addition to the fact that we  
305 might not have accurately modelled the boundary conditions presented during the experiments. For  
306 instance, we were not able to account for the effects of the glass chamber, which could act as a heat sink  
307 that may affect the heat transfer process. Thirdly, our simulation might not have accurately accounted for  
308 all photothermal phenomena presented in the experiments. Given the similarities between our  
309 experimental conditions and those in existing PT-OCT studies, we adapted our model of OPL change due  
310 to absorption from PT-OCT literature. We accounted for two photothermal phenomena: the thermo-optic  
311 effect and thermal expansion. However, other photothermal phenomena such as photo-elastic effect<sup>14</sup>,  
312 acousto-optic effects<sup>15</sup> and thermal forces<sup>16,17</sup> could also be present; we did not consider them to be  
313 significant photothermal contributions due to the absence of their discussion in PT-OCT literature. Further  
314 investigation into these photothermal phenomena will be needed to incorporate them into our simulation.  
315 Finally, our current simulation did not reproduce the phase delay we experimentally observed in the  
316 measured  $\Delta\text{OPL}_{\text{PT}}$  from the 0.1- $\mu\text{m}$  beads (Supplementary Fig. 4). As a result, we could not use the  
317 theoretical simulation of  $\Delta\text{OPL}_{\text{PT}}$  by itself to isolate the mechanical response. However, since the  
318 simulation produced the depth-dependent photothermal response amplitude that agreed with the general  
319 trends with observed on the 0.1- $\mu\text{m}$  beads, we were able to use the functional form of the simulated  
320  $A_{\text{PT}}(z)$  curve to fit the experimental data.

321

322 **Sources of variability in PF-OCE measurements.**

323 Factors that may have contributed to the variability in the mechanical responses of the 3- $\mu\text{m}$   
324 beads in each agarose hydrogel sample include noise in OPL oscillation measurements, possible errors  
325 in compensating for the photothermal responses (which we have discussed in the main article), the  
326 BM-mode beam-scanning acquisition scheme, and microscale mechanical heterogeneity of the agarose  
327 hydrogels.

328 The accuracy of OPL oscillation measurements is dependent on the SNR of the complex OCT  
329 signal. This source of error is most prominent in the photothermal response measured from the 0.1- $\mu\text{m}$   
330 beads, which have low OCT SNR (0-12 dB) due to their weak scattering. However, under the assumption  
331 of transversely uniform photothermal response, the precision of measuring variations in bead total  
332 responses within each sample is governed by the sensitivity of the OPL oscillation measurements on the  
333 3- $\mu\text{m}$  beads, which have higher SNR (>25 dB). Our observed oscillation amplitude sensitivity was  
334 approximately 105 pm (Supplementary Fig. 2). Under the assumption of transversely uniform  
335 photothermal response (i.e., the error from the photothermal curve fits imposes a depth-dependent  
336 systematic error on the isolated mechanical response), this corresponds to the smallest practically  
337 detectable differences in  $A_{\text{mech}}$  of various beads within a sample of 150 pm (3 dB above the noise floor)  
338 for any  $A_{\text{mech}}$  values larger than 0.7 nm (the uncertainty of  $A_{\text{PT}}(z)$  curves). In addition to OPL  
339 measurement errors and data-acquisition-related factors, Brownian motion of the beads inside porous  
340 structures of the agarose hydrogels may also confound the measurements of OPL oscillation induced by  
341 the PF forcing beam. It has been shown that Brownian motion of scattering particles resulted in a  
342 complex OCT signal with a Lorentzian distribution in the temporal frequency domain, which could also  
343 contribute to our observed displacement noise floor being above the shot noise limit.

344 As a result of the 3D BM-mode acquisition scheme the PF forcing beam was transversely aligned  
345 to the centre of each 3- $\mu\text{m}$  bead for only a fraction of the measurements (approximately 10 out of 60  
346 spatial pixels that constituted each bead). In other words, the magnitude of the radiation-pressure force  
347 exerted on a given 3- $\mu\text{m}$  bead was varied as the PF forcing beam was scanned over different parts of  
348 each bead. Thus, we also expect that the resulting oscillations of the 3- $\mu\text{m}$  beads could also be affected  
349 by this variation in the magnitude of force due to the scanning of the PF forcing beam.

350 Part of the variability observed in the maps of amplitude and phase of the 3- $\mu\text{m}$  bead mechanical  
351 responses (Fig. 4b, c in the main manuscript) could also reflect the actual microscale heterogeneity that  
352 was present in the agarose hydrogels. Existing evidence of structural and compositional variability in  
353 agarose hydrogels support the notion that agarose hydrogels are mechanically heterogeneous at the  
354 microscale. Agarose hydrogel is composed of aggregated agar double-helix polymer matrix<sup>18,19</sup>, creating  
355 a porous structure that holds water within its pores (diameter on the order of 1-6  $\mu\text{m}$  for 0.2-0.5% agarose  
356 hydrogels)<sup>4,20</sup>. Additionally, the distribution of pore sizes of one concentration overlaps with that of others  
357 based on atomic force microscopy measurements<sup>20</sup>. Furthermore, studies with optical tweezers based  
358 active microrheology on fibrin hydrogels show that the viscoelastic modulus of hydrogels can have  
359 variations that are over an order of magnitude<sup>21</sup>. The porous structure could result in spatially  
360 heterogeneous mechanical responses measured by PF-OCE on each of the 3- $\mu\text{m}$  beads. For instance,  
361 beads with larger  $A_{\text{mech}}$  in each sample may be located inside larger pores, diffusing in the fluid phase of  
362 the biphasic hydrogels, whereas those with lower  $A_{\text{mech}}$  may be trapped in the solid phase made up of  
363 agarose polymer matrix. Furthermore, the microstructure of agarose hydrogels is known to change over  
364 time due to multiple naturally occurring dynamic processes, including agarose fibre aggregation and local  
365 water expulsion from pores, collectively called 'syneresis'<sup>1-3</sup>. This dynamic change may have caused the  
366 variability between measurements from the different imaging locations in each sample (Supplementary  
367 Fig. 8), which were acquired at different times (separated by more than 1 hour) after the sample was first  
368 made.  
369

370 **Supplementary References**

- 371 1 Mao, R., Tang, J. & Swanson, B. G. Water holding capacity and microstructure of gellan gels. *Carbohydr.*  
372 *Polym.* **46**, 365-271 (2001).
- 373 2 Boral, S., Saxena, A. & Bohidar, H. B. Syneresis in agar hydrogels. *Int. J. Biol. Macromolec.* **46**, 232-236  
374 (2010).
- 375 3 Divoux, T., Mao, B. & Snabre, P. Syneresis and delayed detachment in agar plates. *Soft Matter* **11**, 3677-  
376 3685 (2015).
- 377 4 Narayanan, J., Xiong, J. Y. & Liu, X. Y. Determination of agarose gel pore size: Absorbance measurements  
378 vis a vis other techniques. *J Phys Confer Ser* **28**, 83-86 (2006).
- 379 5 *M11507; 7732-18-5*; (The Royal Society of Chemistry).
- 380 6 Zhang, M. *et al.* Experimental Determination of Thermal Conductivity of Water-Agar Gel at Different  
381 Concentrations and Temperatures. *J. Chem. Eng. Data* **56**, 859-864 (2011).
- 382 7 Hale, G. M. & Query, M. R. Optical Constants of Water in the 200-nm to 200-um Wavelength Region. *Appl.*  
383 *Opt.* **12**, 555-563 (1973).
- 384 8 Hawkes, J. B. & Astheimer, R. W. The Temperature Coefficient of the Refractive Index of Water. *J. Opt.*  
385 *Soc. Am.* **38**, 804-806 (1948).
- 386 9 Aizawa, M. & Suzuki, S. Properties of Water in Macromolecular Gels. III. Dilatometric Studies of the  
387 Properties of Water in Macromolecular Gels. *Bull. Chem. Soc. Jpn.* **44**, 2967-2971 (1971).
- 388 10 Lapierre-Landry, M., Tucker-Schwartz, J. m. & Skala, M. C. Depth-resolved analytical model and correction  
389 algorithm for photothermal optical coherence tomography. *Biomed. Opt. Exp.* **7**, 2607-2622 (2016).
- 390 11 Oestreicher, H. L. Field and Impedance of an Oscillating Sphere in a Viscoelastic Medium with an  
391 Application to Biophysics. *J. Acous. Soc. Am.* **23**, 707-714 (1951).
- 392 12 Park, B. H. *et al.* Real-time fiber-based multi-functional spectral-domain optical coherence tomography at 1.3  
393 um. *Opt. Exp.* **13**, 3931-3944 (2005).
- 394 13 Chang, E. W., Kobler, J. B. & Yun, S. H. Subnanometer optical coherence tomographic vibrography. *Opt.*  
395 *Lett.* **37**, 3678-3680 (2012).
- 396 14 Wang, L. V. & Hu, S. Photoacoustic Tomography: In Vivo Imaging from Organelles to Organs. *Science* **335**,  
397 1458-1462 (2012).
- 398 15 Hajireza, P., Shi, W., Bell, K., Paproski, R. J. & Zemp, R. J. Non-interferometric photoacoustic remote  
399 sensing microscopy. *Light Sci. Appl.* **6**, e16278 (2017).

400 16 Nichols, E. F. & Hull, G. F. A preliminary communication of the pressure of heat and light. *Phys. Rev. (Series*  
401 *I)* **13**, 307-320 (1901).

402 17 Akhtaruzzaman, A. F. M. & Lin, S. P. Photophoresis of absorbing particles. *J. Colloid Interface Sci.* **61**, 170-  
403 182 (1976).

404 18 Djabourov, M., Clark, A. H., Rowlands, D. W. & Ross-Murphy, S. B. Small-angle x-ray scattering  
405 characterization of agarose sols and gels. *Macromolecules* **22**, 180-188 (1989).

406 19 Zucca, P., Fernandez-Lafuente, R. & Sanjust, E. Agarose and Its Derivatives as Supports for Enzyme  
407 Immobilization. *Molecules* **21**, 1577 (2016).

408 20 Pernodet, N., Maaloum, M. & Tinland, B. Pore size of agarose gels by atomic force microscopy.  
409 *Electrophoresis* **18**, 55-58 (1997).

410 21 Kotlarchyk, M. A. *et al.* Concentration Independent Modulation of Local Micromechanics in a Fibrin Gel.  
411 *PLoS ONE* **6**, e20201 (2011).

412
