# Supplementary material for: Photonic force optical coherence elastography for three-dimensional mechanical microscopy
Source: PubMed Central journal article supplement (PMC5970204; doi:10.1038/s41467-018-04357-8), 2018-05-25
Supplement: 41467_2018_4357_MOESM2_ESM.pdf [file 41467_2018_4357_MOESM2_ESM.pdf]

**Editorial Note:** This manuscript has been previously reviewed at another journal that is not operating a transparent peer review scheme. The manuscript was considered suitable for publication without further review at *Nature Communications*.
