# Supplementary material for: Photonic force optical coherence elastography for three-dimensional mechanical microscopy
Source: PubMed Central journal article supplement (PMC5970204; doi:10.1038/s41467-018-04357-8), 2018-05-25
Supplement: 41467_2018_4357_MOESM3_ESM.pdf [file 41467_2018_4357_MOESM3_ESM.pdf]

## Description of Additional Supplementary Files

Supplementary Movie 1: A continuous sequence of *en face* and cross-sectional projections of  $A_{\text{mech}}(x_b, y_b, z_b)$  and  $A_{\text{PT}}(x, y, z)$  in 2D and 3D space, shown with their corresponding OCT images. Scale bars: 20  $\mu\text{m}$ .
